# Supplementary material for: Exploiting the biomimetic and luminescence properties of multivalent dendrimer–semiconductor nanohybrid materials in the ultra-low level determination of folic acid
Source: Royal Society of Chemistry journal article supplement (doi:10.1039/c6an02284g), 2017-01-01
Supplement: c6an02284g1.pdf [file c6an02284g1.pdf]

## **Supplementary Information**

### **Exploiting Biomimetic and Luminescence Properties of Multivalent Dendrimer-Semiconductor Nanohybrid Material in Ultra-Low Level Determination of Folic Acid**

Somashree Kundu, Susmita Maiti, Tushar Kanti Das, Debasmita Ghosh, Chandra Nath Roy and Abhijit Saha

UGC-DAE Consortium for Scientific Research, Kolkata Centre, III/LB-8 Bidhannagar, Kolkata 700098, India

Corresponding author: Dr. Abhijit Saha

UGC-DAE Consortium for Scientific Research, Kolkata Centre,  
III/LB-8 Bidhannagar, Kolkata 700098, India;

\*E-mail: [abhijit@alpha.iuc.res.in](mailto:abhijit@alpha.iuc.res.in)

Tel: +91-33-23358035; FAX: =91-33-23357008

### Synthesis of Cysteine and BSA capped CdS QDs.

In a typical synthesis, an aqueous solution of L-cysteine ( $5 \times 10^{-3} \text{ M}$ ) and  $\text{Cd}^{2+}$  ion ( $2 \times 10^{-3} \text{ M}$ ) was prepared and pH was adjusted to 11.2–11.8 (using Jenway 3345 ion meter) by adding dilute NaOH solution. Then sodium sulfide ( $\text{Na}_2\text{S}$ ) solution was injected under  $\text{N}_2$ -purged condition. The resultant solution was refluxed for five minute and a yellow colored solution of CdS QDs appeared. Final molar ratio of cysteine: $\text{Cd}^{2+}$ : $\text{S}^{2-}$  was kept as 5:2:1. For synthesis of BSA capped CdS QDs,  $\text{Cd}^{2+}$  ion ( $2 \times 10^{-3} \text{ M}$ ) was mixed with BSA solution at a concentration of BSA 3mg/mL.

### Absorption spectroscopy for interaction of Dendrimer encapsulated ZnS QDs

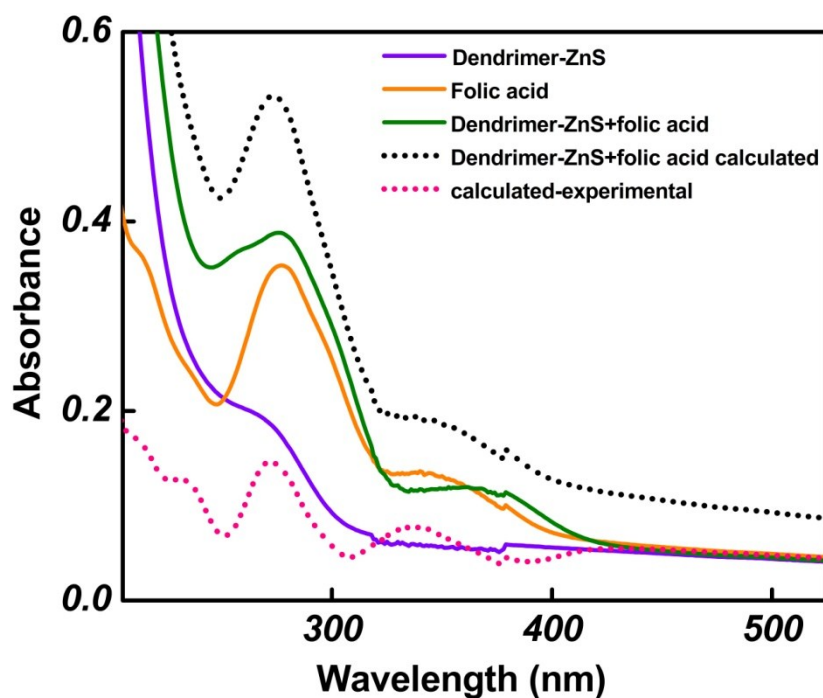

**Fig S-1** Absorption spectra showing interactions of folic acid with dendrimer encapsulated ZnS QDs

## Emission quenching behavior of Dendrimer-ZnS QDs on interaction of folic acid

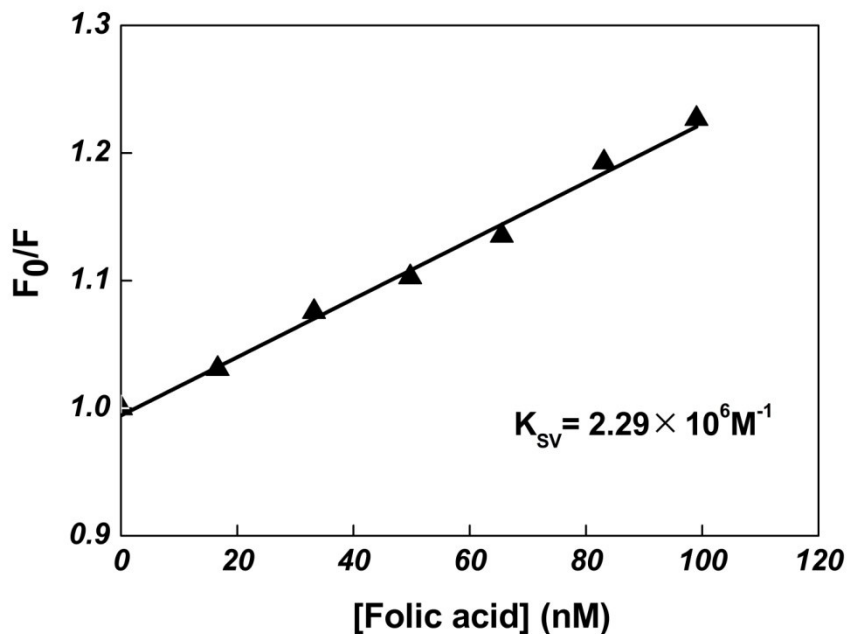

**Fig S-2** Stern-Volmer plot on interaction of folic acid with dendrimer encapsulated ZnS QDs

**TableS-1.** Luminescence lifetime data at 510 nm on dendrimer encapsulated CdS QDs with excitation at 375nm with varying concentration of folic acid.

| Folic Acid (nM) | $\tau_1$ (ns) | $\tau_2$ (ns) | $A_1$ | $A_2$ | $\tau_{av}$ (ns) | $\chi^2$ |
|-----------------|---------------|---------------|-------|-------|------------------|----------|
| 0.0             | 2.86          | 31.40         | 53.01 | 46.99 | 28.74            | 1.14     |
| 66.2            | 2.88          | 30.15         | 55.79 | 44.21 | 27.21            | 1.08     |
| 131.5           | 3.69          | 32.93         | 55.84 | 44.16 | 29.30            | 0.98     |
| 196.0           | 3.92          | 32.50         | 59.75 | 40.25 | 25.16            | 0.99     |

# **Thermodynamics of interaction of folic acid with dendrimer and dendrimer encapsulated CdS QDs**

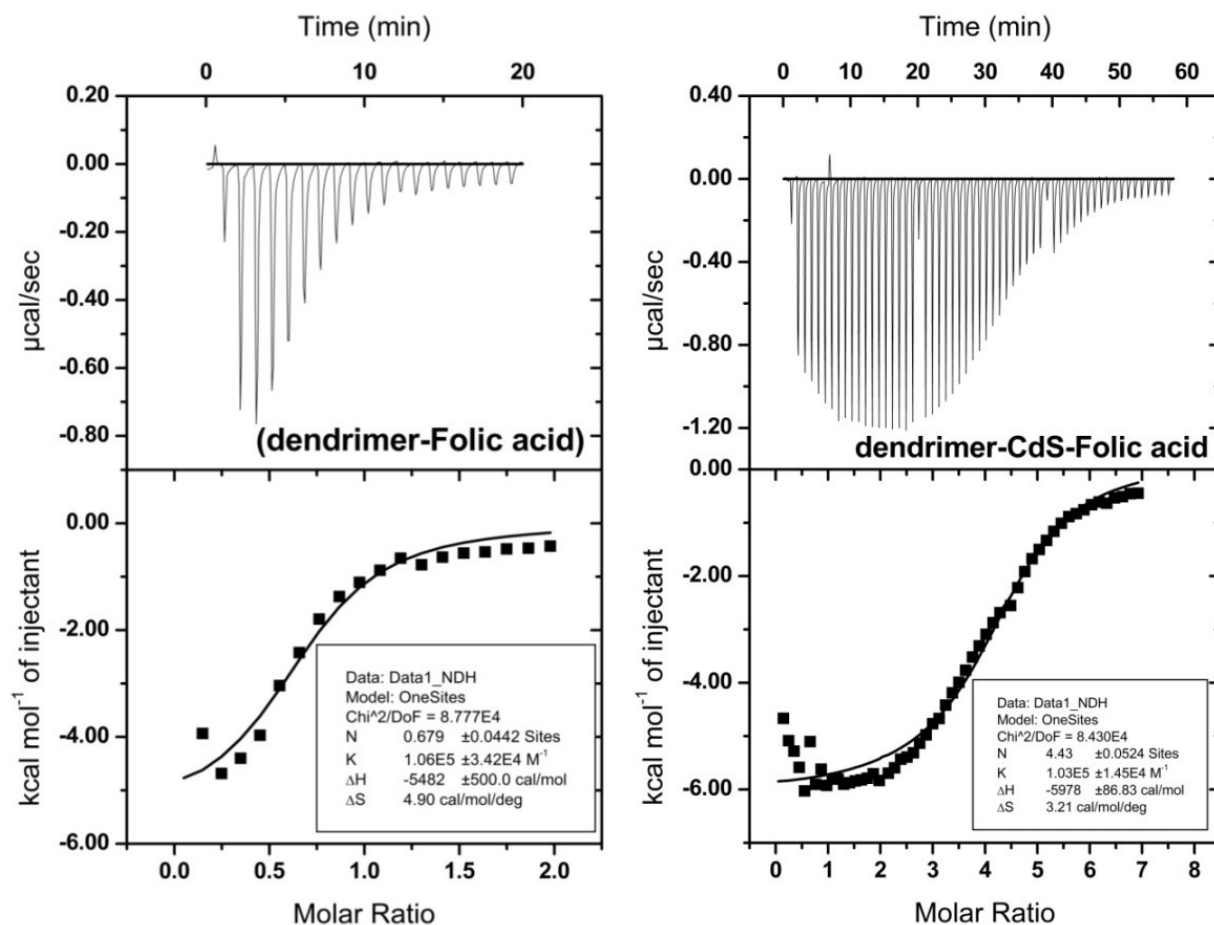

**Figure S-3** Isothermal titration calorimetric analysis of dendrimer or dendrimer encapsulated CdS QDs with folic acid

## Determination of folic acid in pharmaceutical samples

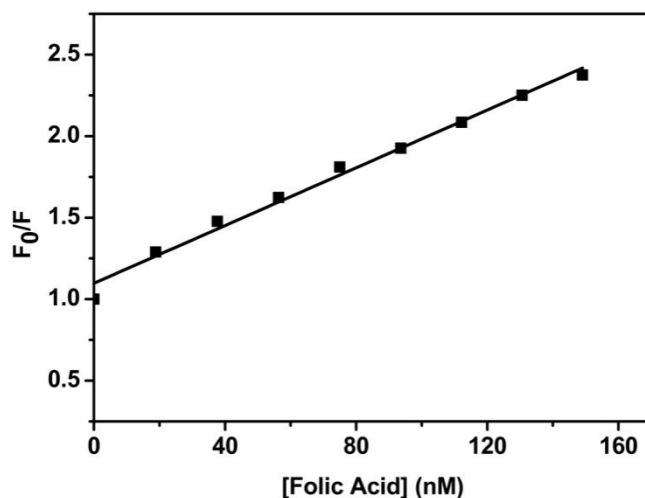

**Figure S-4** Calibration curve for the determination folic acid in pharmaceutical tablets using dendrimer encapsulated CdS QDs.

### Calculation of binding constant:

For static quenching, the relationship between fluorescence quenching intensity and the concentration of quenchers can be described by the equation given below<sup>1, 2</sup>.

$$\frac{F_0 - F}{F - F_\infty} = \left( \frac{[FolicAcid]^n}{K_D} \right)$$

Where  $F_\infty$  is the intensity of QDs saturated with the quencher. A typical doublelogarithm plot is shown in Fig. S-5. The value of  $\log [Folic\ Acid]$  at  $\log (F_0 - F)/(F - F_\infty) = 0$  equals the logarithm of dissociate constant ( $K_D$ ) and the reciprocal of  $K_D$  is the binding constant ( $K_b$ ).

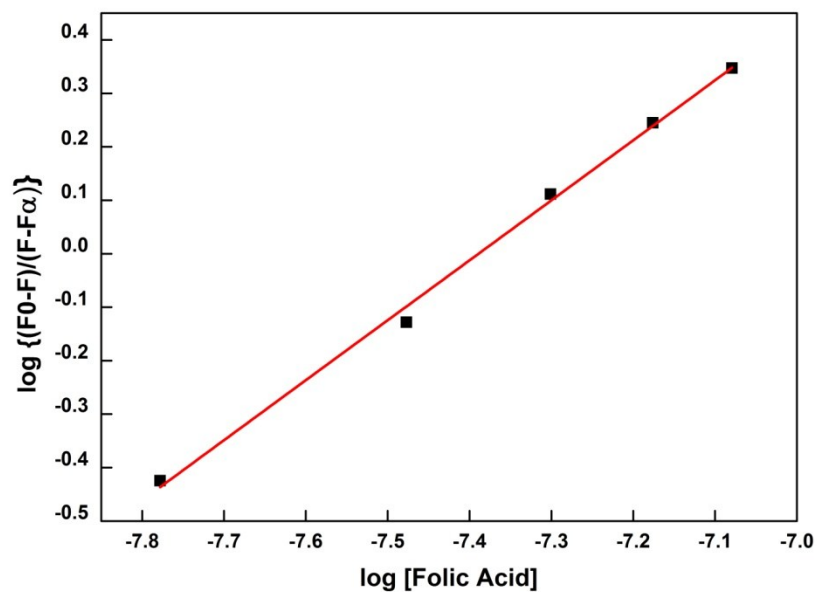

**Fig S-5:** plot for determination of binding constant of folic acid and dendrimer-CdS QDs.

## References:

1. AC.Tedesco, DM.Oliveira, J Appl Phys, 2003,93, 6704–6706.
2. H. Xu, Q.Liu, Y.Wen, Spectrochim Acta Part A, **2008**, 71, 984–988.
